# Supplementary material for: Synthesis and characterization of promising insensitive energetic salts based on 3-amino-5-hydrazinopyrazole
Source: Royal Society of Chemistry journal article supplement (doi:10.1039/d1dt00527h), 2021-01-01
Supplement: d1dt00527h1.pdf [file d1dt00527h1.pdf]

## Supporting Information

### Synthesis and characterization of the promising insensitive energetic salts based on 3-amino-5-hydrazinopyrazole

Zhenli Yang,<sup>a</sup> Yuemei Wu,<sup>b</sup> Piao He,<sup>c</sup> Wenli Cao,<sup>a</sup> Saira Manzoor<sup>a</sup> and Jianguo Zhang<sup>\*a</sup>

<sup>a</sup> State Key Laboratory of Explosion Science and Technology, Beijing Institute of Technology, Beijing 100081, P. R. China.

<sup>b</sup> China Industrial Control Systems Cyber Emergency Response Team, Beijing 100040, P. R. China.

<sup>c</sup> College of Chemistry and Chemical Engineering, Central South University, Changsha 410083, Hunan, P. R. China.

#### Table of contents

|                                                                                   |            |
|-----------------------------------------------------------------------------------|------------|
| <b>Section 1. Materials and instrumentations</b> .....                            | <i>S2</i>  |
| <b>Section 2. X-ray crystallography</b> .....                                     | <i>S7</i>  |
| <b>Section 3. Non-isothermal kinetics and hygroscopic property analysis</b> ..... | <i>S9</i>  |
| <b>Section 4. Measurement of energy of constant volume combustion</b> .....       | <i>S10</i> |
| <b>Section 5. Computational structural considerations</b> .....                   | <i>S11</i> |

## Section 1. Materials and instrumentations

All the chemical reagents and solvents were purchased from the reagents company of Aladdin and were used as received without further treatment. Elemental analysis was performed with a Flash EA 1112 fully automatic trace element analyzer. Fourier Transform Infrared Spectroscopy (FT-IR) spectra was recorded on an IRPrestige-21 spectrometer using KBr pellets from 400 to 4000  $\text{cm}^{-1}$  with a resolution of 4  $\text{cm}^{-1}$ .

**3-amino-5-hydrazinopyrazole dihydrochloride (1)** IR (KBr,  $\text{cm}^{-1}$ ) :  $\nu=3419, 3105, 1633, 1528, 1435, 1269, 1089, 920, 796, 705$ ; MS (ESI<sup>+</sup>):  $m/z = 114.09$  [ $\text{C}_3\text{H}_8\text{N}_5^+$ ]; MS (ESI<sup>-</sup>):  $m/z = 35.00$  [ $\text{Cl}^-$ ].  $\text{C}_3\text{H}_9\text{Cl}_2\text{N}_5$  (186.0): calcd C 19.37, H 4.88, N 37.64; found C 19.33, H 4.91, N 37.68.

**3-amino-5-hydrazinopyrazole dinitrate (2)** Yield: 0.39 g, 82%; IR (KBr,  $\text{cm}^{-1}$ ) :  $\nu=3428, 1624, 1498, 1384, 1083, 956, 825, 553$ ; MS (ESI<sup>+</sup>):  $m/z = 114.09$  [ $\text{C}_3\text{H}_8\text{N}_5^+$ ]; MS (ESI<sup>-</sup>):  $m/z = 61.99$  [ $\text{NO}_3^-$ ].  $\text{C}_3\text{H}_9\text{Cl}_2\text{N}_5$  (239.1): calcd C 15.07, H 3.79, N 41.00; found C 15.06, H 3.83, N 41.03.

**3-amino-5-hydrazinopyrazole dipicrate (3)** Yield: 0.835 g, 73%; IR (KBr,  $\text{cm}^{-1}$ ) :  $\nu=3463, 3326, 3140, 2928, 2691, 1605, 1539, 1332, 1168, 1084, 917$ ; MS (ESI<sup>+</sup>):  $m/z = 114.09$  [ $\text{C}_3\text{H}_8\text{N}_5^+$ ]; MS (ESI<sup>-</sup>):  $m/z = 227.99$  [ $\text{C}_6\text{H}_2\text{N}_3\text{O}_7^-$ ].  $\text{C}_{15}\text{H}_{13}\text{N}_{11}\text{O}_{14}$  (571.3): calcd C 31.53, H 2.29, N 26.97; found C 31.58, H 2.30, N 26.93.

**3-amino-5-hydrazinopyrazole dinitroresorcinate (4)** Yield: 0.908 g, 75%; IR (KBr,  $\text{cm}^{-1}$ ) :  $\nu=3581, 3483, 3384, 3185, 1645, 1541, 1377, 1085, 928, 780, 693$ ; MS (ESI<sup>+</sup>):  $m/z = 114.07$  [ $\text{C}_3\text{H}_8\text{N}_5^+$ ]; MS (ESI<sup>-</sup>):  $m/z = 243.98$  [ $\text{C}_6\text{H}_2\text{N}_3\text{O}_8^-$ ].  $\text{C}_{15}\text{H}_{13}\text{N}_{11}\text{O}_{16}$  (603.3): calcd C 29.86, H 2.17, N 25.54; found C 29.82, H 2.19, N 25.50.

**3-amino-5-hydrazinopyrazole di(5-nitramino-tetrazole) (5)** Yield: 0.582 g, 78%; IR (KBr,  $\text{cm}^{-1}$ ) :  $\nu=3438, 3151, 2953, 2732, 1672, 1616, 1533, 1433, 1335, 989, 744$ ; MS (ESI<sup>+</sup>):  $m/z = 114.07$  [ $\text{C}_3\text{H}_8\text{N}_5^+$ ]; MS (ESI<sup>-</sup>):  $m/z = 129.01$  [ $\text{CHN}_6\text{O}_2^-$ ].  $\text{C}_5\text{H}_{11}\text{N}_{17}\text{O}_4$  (373.3): calcd C 16.09, H 2.97, N 63.79; found C 16.09, H 2.93, N 63.84.

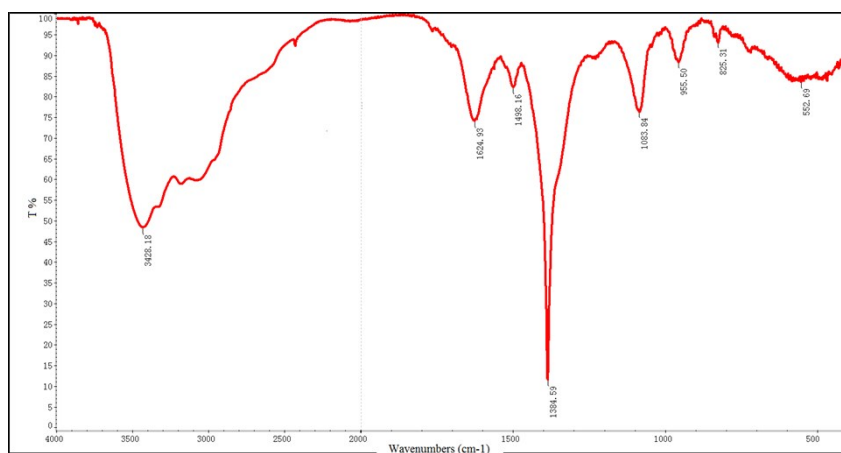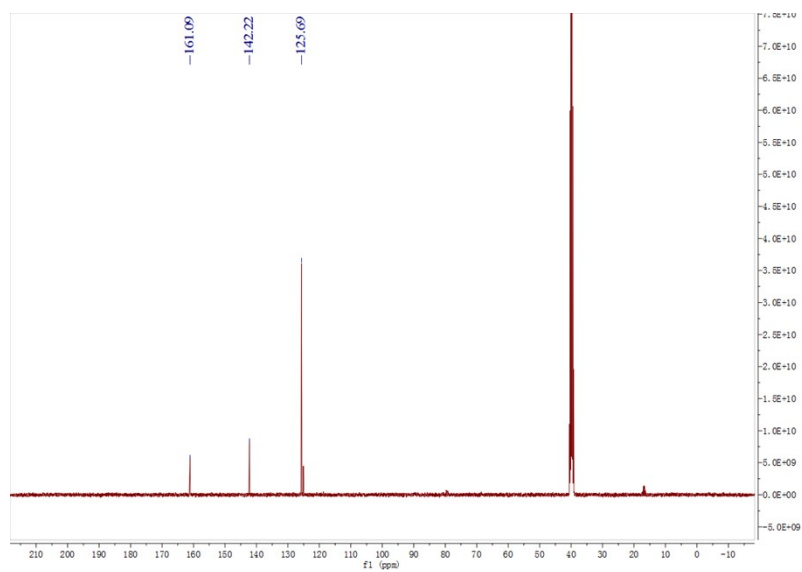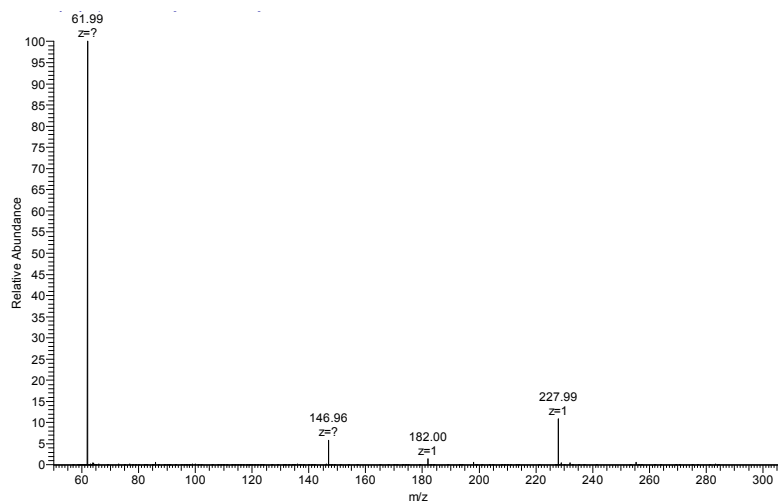

**Figure S1.** IR (top), <sup>13</sup>C NMR, and MS (bottom) Spectrum of **2**.

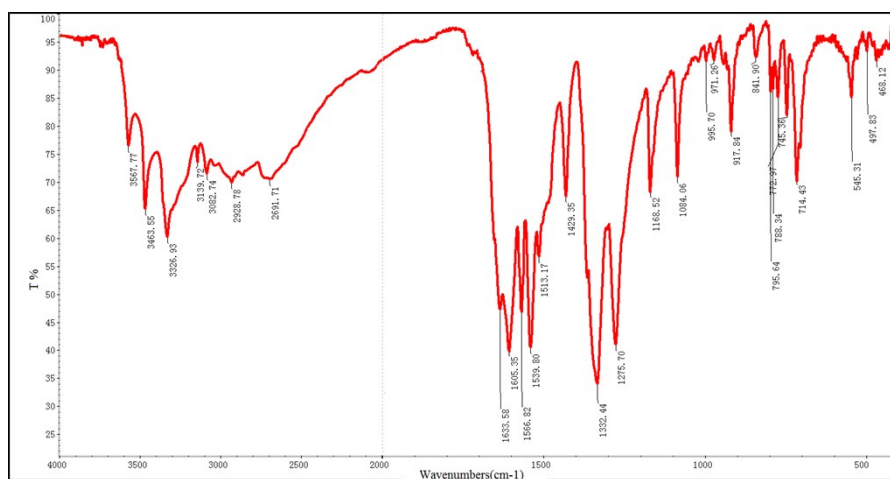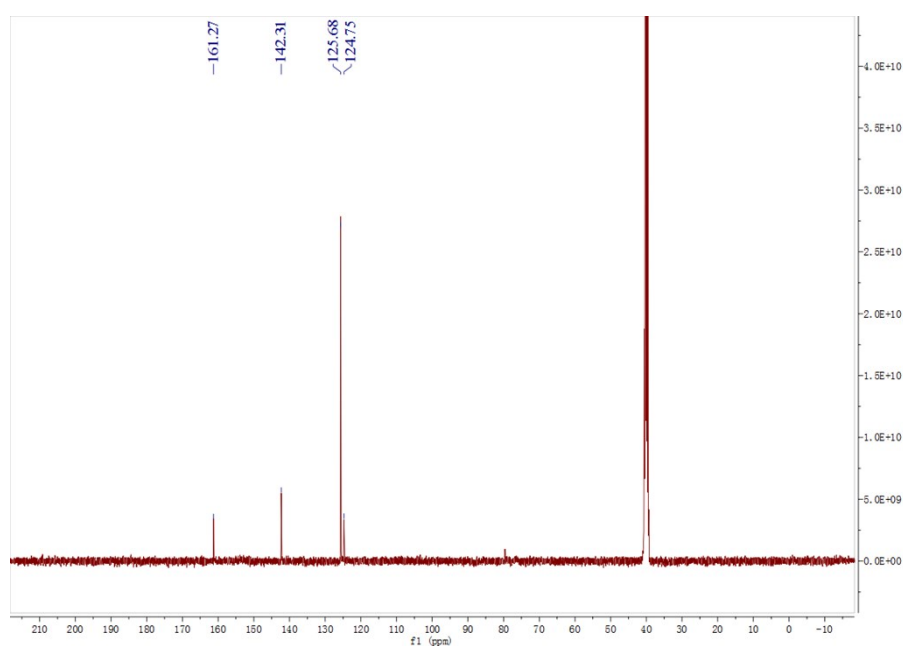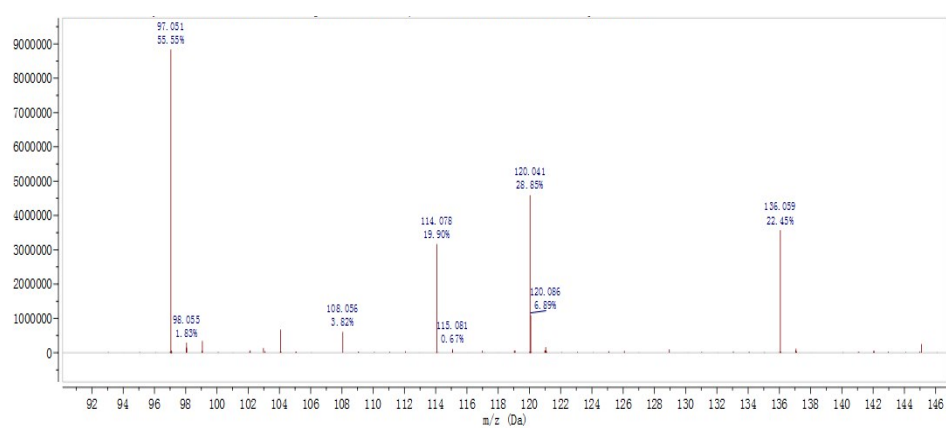

**Figure S2.** IR (top),  $^{13}\text{C}$  NMR, and MS (bottom) Spectrum of **3**.

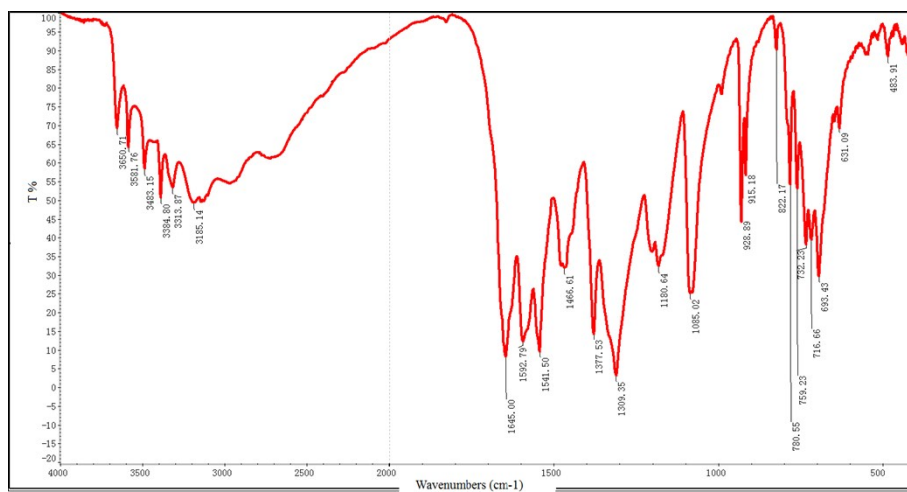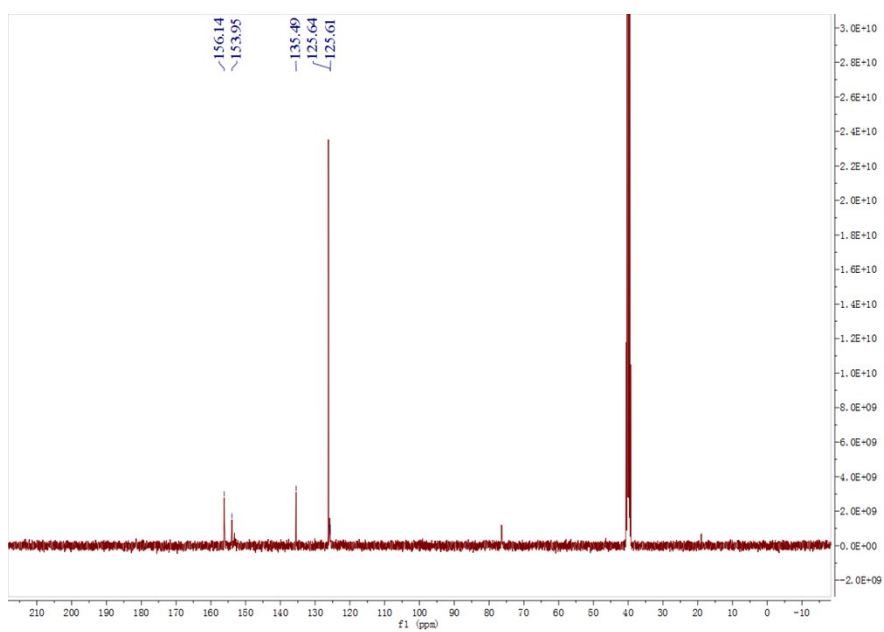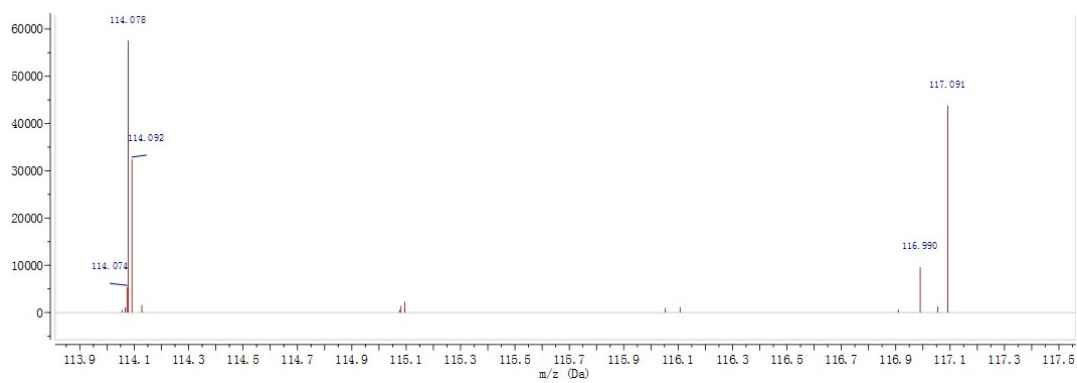

**Figure S3.** IR (top), <sup>13</sup>C NMR, and MS (bottom) Spectrum of **4**.

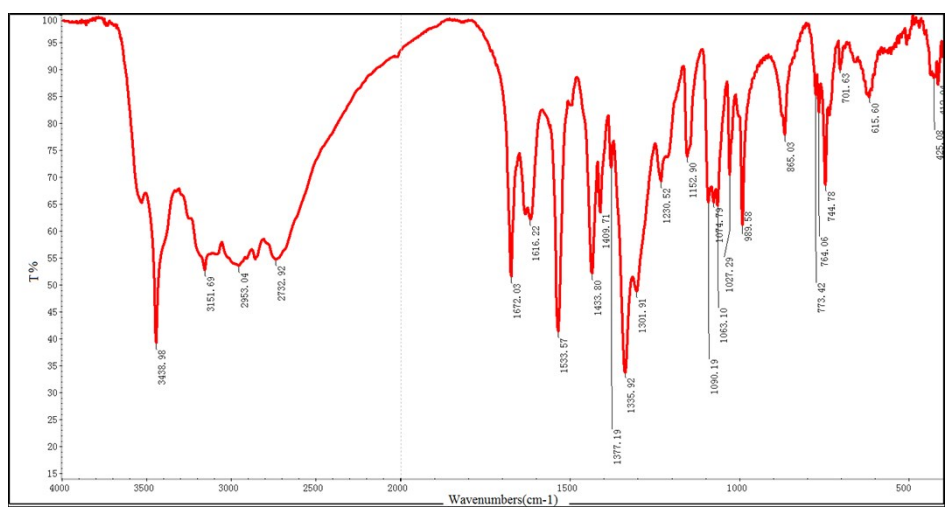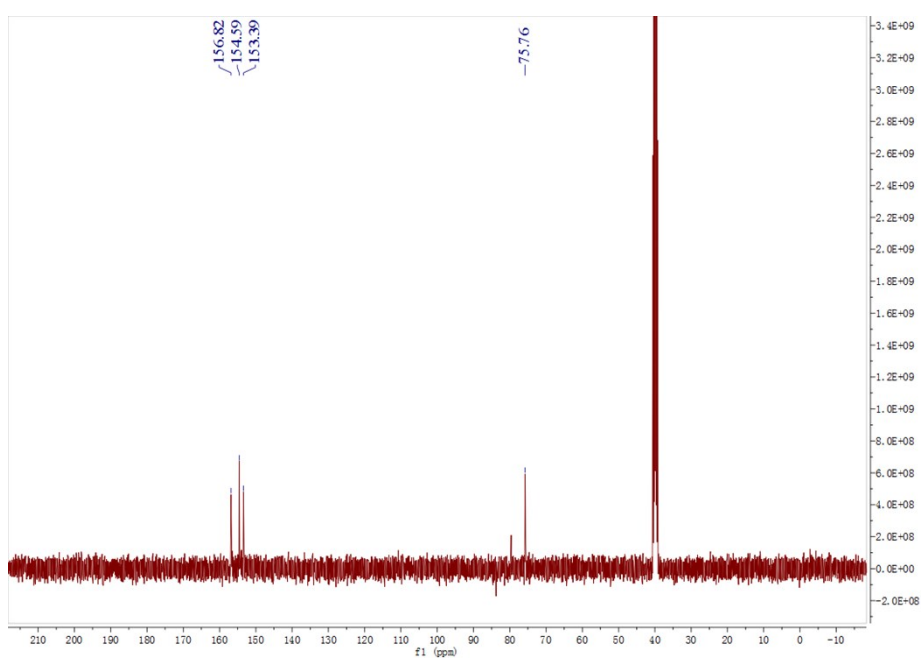

**Figure S4.** IR (top), <sup>13</sup>C NMR, and MS (bottom) Spectrum of **5**

## Section 2. X-ray crystallography

The obtained signal crystal of five 3-amino-5-hydrazinopyrazole derivatives were used in the X-ray diffraction study. Crystallographic data and experimental details for structure analyses are outlined in **Table S1** to **Table S11**.

Table S1. Crystallographic data for compounds 1–5

|                                                                   | 1                                                            | 2                                                           | 3                                                               | 4                                                               | 5                                                             |
|-------------------------------------------------------------------|--------------------------------------------------------------|-------------------------------------------------------------|-----------------------------------------------------------------|-----------------------------------------------------------------|---------------------------------------------------------------|
| Formula                                                           | C <sub>3</sub> H <sub>9</sub> Cl <sub>2</sub> N <sub>5</sub> | C <sub>3</sub> H <sub>9</sub> N <sub>7</sub> O <sub>6</sub> | C <sub>15</sub> H <sub>15</sub> N <sub>11</sub> O <sub>15</sub> | C <sub>15</sub> H <sub>23</sub> N <sub>11</sub> O <sub>21</sub> | C <sub>5</sub> H <sub>15</sub> N <sub>17</sub> O <sub>6</sub> |
| FW(g·mol <sup>-1</sup> )                                          | 186.05                                                       | 239.17                                                      | 589.38                                                          | 693.44                                                          | 409.34                                                        |
| Crystal system                                                    | Triclinic                                                    | Monoclinic                                                  | Triclinic                                                       | Triclinic                                                       | Orthorhombic                                                  |
| Space group                                                       | <i>P</i> -1                                                  | <i>P</i> 2 <sub>1</sub> / <i>c</i>                          | <i>P</i> -1                                                     | <i>P</i> -1                                                     | <i>Pbca</i>                                                   |
| Crystalsize(mm)                                                   | 0.13 × 0.12 × 0.08                                           | 0.23 × 0.21 × 0.2                                           | 0.13 × 0.12 × 0.1                                               | 0.13 × 0.12 × 0.1                                               | 0.15 × 0.12 × 0.1                                             |
| <i>a</i> (Å)                                                      | 5.1549(10)                                                   | 6.6631(13)                                                  | 7.8469(16)                                                      | 9.4180(19)                                                      | 9.5665(19)                                                    |
| <i>b</i> (Å)                                                      | 6.9133(14)                                                   | 9.3281(19)                                                  | 12.050(2)                                                       | 10.361(2)                                                       | 6.7226(13)                                                    |
| <i>c</i> (Å)                                                      | 11.867(2)                                                    | 14.077(3)                                                   | 12.748(3)                                                       | 13.935(3)                                                       | 50.601(10)                                                    |
| $\alpha$ (°)                                                      | 74.96(3)                                                     | 90.00                                                       | 73.00(3)                                                        | 100.85(3)                                                       | 90.00                                                         |
| $\beta$ (°)                                                       | 80.75(3)                                                     | 93.39(3)                                                    | 83.11(3)                                                        | 90.30(3)                                                        | 90.00                                                         |
| $\gamma$ (°)                                                      | 88.14(3)                                                     | 90.00                                                       | 76.27(3)                                                        | 92.25(3)                                                        | 90.00                                                         |
| <i>V</i> (Å <sup>3</sup> )                                        | 403.10(15)                                                   | 873.4(3)                                                    | 1118.1(5)                                                       | 1334.3(5)                                                       | 3254.2(11)                                                    |
| <i>Z</i>                                                          | 2                                                            | 4                                                           | 2                                                               | 2                                                               | 8                                                             |
| $\rho$ (g·cm <sup>-3</sup> )                                      | 1.533                                                        | 1.819                                                       | 1.751                                                           | 1.726                                                           | 1.671                                                         |
| $\mu$ (mm <sup>-1</sup> )                                         | 0.741                                                        | 0.171                                                       | 0.158                                                           | 0.163                                                           | 0.146                                                         |
| <i>F</i> (000)                                                    | 192.0                                                        | 496.0                                                       | 604.0                                                           | 716.0                                                           | 1696.0                                                        |
| Refl. coll.                                                       | 3564                                                         | 1498                                                        | 15502                                                           | 12404                                                           | 11169                                                         |
| Indep. reflns.                                                    | 1803                                                         | 1498                                                        | 5127                                                            | 6042                                                            | 3556                                                          |
| Params.                                                           | 91                                                           | 146                                                         | 370                                                             | 428                                                             | 261                                                           |
| <i>S</i>                                                          | 1.105                                                        | 1.161                                                       | 1.117                                                           | 1.105                                                           | 1.212                                                         |
| <i>R</i> <sub>1</sub> ( <i>I</i> > 2σ( <i>I</i> )) <sup>a</sup>   | 0.0344                                                       | 0.0544                                                      | 0.0477                                                          | 0.0758                                                          | 0.0924                                                        |
| <i>R</i> <sub>1</sub> (all data)                                  | 0.0371                                                       | 0.0573                                                      | 0.0516                                                          | 0.0974                                                          | 0.1103                                                        |
| w <i>R</i> <sub>2</sub> ( <i>I</i> > 2σ( <i>I</i> )) <sup>a</sup> | 0.0841                                                       | 0.1338                                                      | 0.1104                                                          | 0.1717                                                          | 0.1753                                                        |
| w <i>R</i> <sub>2</sub> (all data)                                | 0.0874                                                       | 0.1355                                                      | 0.1131                                                          | 0.1903                                                          | 0.1848                                                        |
| CCDC No.                                                          | 2005504                                                      | 2005505                                                     | 2005506                                                         | 2005507                                                         | 2005508                                                       |

Table S2. Selected bond lengths for salt 1

| Bond length (Å) |          |        |        |        |          |        |          |
|-----------------|----------|--------|--------|--------|----------|--------|----------|
| N1-N2           | 1.399(2) | N2-H2  | 0.8500 | N-C1   | 1.353(3) | N3-H3  | 0.8500   |
| N2-C3           | 1.358(3) | N4-H4A | 0.8500 | N3-N4  | 1.432(2) | N4-H4B | 0.8500   |
| N3-C3           | 1.371(3) | N4-H4C | 0.8500 | N5-C1  | 1.332(3) | N5-H5A | 0.8500   |
| C1-C2           | 1.404(3) | N5-H5B | 0.8500 | C2-H2A | 0.9500   | C2-C3  | 1.381(3) |

Table S3. Selected dihedral angles for salt 1

| Dihedral angle (°) |           |             |            |             |           |             |            |
|--------------------|-----------|-------------|------------|-------------|-----------|-------------|------------|
| C1-N1-N2-C3        | 9.0(2)    | N2-N1-C1-N5 | 172.92(17) | N2-N1-C1-C2 | -7.3(2)   | N1-N2-C3-N3 | 167.99(16) |
| N1-N2-C3-C2        | -7.5(2)   | N4-N3-C3-N2 | 166.24(16) | N4-N3-C3-C2 | -19.4(3)  | N1-C1-C2-C3 | 2.7(2)     |
| N5-C1-C2-C3        | -177.5(2) | C1-C2-C3-N2 | 3.1(2)     | C1-C2-C3-N3 | -171.6(2) |             |            |

Table S4. Selected bond lengths for salt 2

| Bond length (Å) |          |        |          |       |          |       |          |
|-----------------|----------|--------|----------|-------|----------|-------|----------|
| N1-C1           | 1.362(4) | N2-H2A | 0.8500   | N2-N3 | 1.368(4) | O3-N6 | 1.276(3) |
| N2-C1           | 1.332(4) | N3-C3  | 1.338(4) | N4-N5 | 1.423(4) | N4-C3 | 1.380(4) |
| C1-C2           | 1.394(4) | O1-N6  | 1.238(4) | C2-H2 | 0.9500   | O4-N7 | 1.269(4) |
| O5-N7           | 1.238(4) | C2-C3  | 1.387(4) | O6-N7 |          |       |          |

Table S5. Selected dihedral angles for salt 2

| Dihedral angle (°) |         |             |           |             |          |             |           |
|--------------------|---------|-------------|-----------|-------------|----------|-------------|-----------|
| C1-N2-N3-C3        | 5.1(3)  | N3-N2-C1-N1 | 179.8(3)  | N3-N2-C1-C2 | -3.5(4)  | N2-N3-C3-N4 | -179.8(3) |
| N2-N3-C3-C2        | -4.8(4) | N5-N4-C3-N3 | -167.5(3) | N5-N4-C3-C2 | 18.8(5)  | N1-C1-C2-C3 | 176.9(3)  |
| N2-C1-C2-C3        | 0.5(4)  | C1-C2-C3-N3 | 2.7(4)    | C1-C2-C3-N4 | 177.0(3) |             |           |

Table S6. Selected bond lengths for salt 3

| Bond length (Å) |          |         |          |         |          |         |          |
|-----------------|----------|---------|----------|---------|----------|---------|----------|
| O1-N6           | 1.233(2) | C10-C11 | 1.441(2) | C10-C15 | 1.380(2) | O3-N7   | 1.225(2) |
| C11-C12         | 1.443(2) | O4-N7   | 1.234(2) | C12-C13 | 1.369(2) | N6-C4   | 1.452(2) |
| N2-C1           | 1.376(2) | N7-C6   | 1.442(2) | N3-N4   | 1.376(2) | N8-C8   | 1.460(2) |
| N3-C1           | 1.337(2) | C4-C5   | 1.376(2) | N4-C3   | 1.343(2) | N5-C3   | 1.342(2) |
| O8-N9           | 1.214(2) | N1-H1A  | 0.8500   | O9-N9   | 1.213(2) | O10-C11 | 1.260(2) |
| O11-N10         | 1.228(2) | O12-N10 | 1.228(2) | N3-H3   | 0.8500   | O13-N11 | 1.229(2) |
| C5-H5           | 0.9500   | N9-C10  | 1.457(2) | N10-C12 | 1.456(2) |         |          |

Table S7. Selected dihedral angles for salt 3

| Dihedral angle (°) |             |             |             |             |             |             |             |
|--------------------|-------------|-------------|-------------|-------------|-------------|-------------|-------------|
| O1-N6-C4-C5        | -153.24(16) | O1-N6-C4-C9 | 29.4(2)     | O3-N7-C6-C7 | 174.18(17)  | O4-N7-C6-C5 | 172.63(16)  |
| O4-N7-C6-C7        | -7.3(2)     | O5-N8-C8-C9 | -148.81(16) | O6-N8-C8-C7 | -148.07(16) | N6-C4-C5-C6 | -177.12(15) |
| C9-C4-C5-C6        | 0.1(3)      | N6-C4-C9-O7 | -10.0(3)    | C5-C4-C9-C8 | -6.4(2)     | C4-C5-C6-C7 | 4.4(3)      |
| N7-C6-C7-C8        | 178.15(16)  | C5-C6-C7-C8 | -1.8(3)     | C6-C7-C8-N8 | 175.74(15)  | C6-C7-C8-C9 | -5.6(3)     |

Table S8. Selected bond lengths for salt 4

| Bond length (Å) |          |         |          |         |          |         |          |
|-----------------|----------|---------|----------|---------|----------|---------|----------|
| O1-N6           | 1.228(2) | N10-C12 | 1.433(2) | O2-N6   | 1.223(2) | N11-C14 | 1.468(3) |
| O4-N7           | 1.253(2) | C10-C15 | 1.445(3) | O5-N7   | 1.231(2) | C10-C11 | 1.377(3) |
| O6-N8           | 1.226(2) | C11-C12 | 1.381(3) | O7-N8   | 1.216(2) | C12-C13 | 1.419(3) |
| O8-C9           | 1.259(2) | C13-C14 | 1.371(3) | O3-H3   | 0.8400   | C14-C15 | 1.438(3) |
| N6-C4           | 1.464(3) | N1-N2   | 1.441(2) | N7-C6   | 1.426(2) | N2-C1   | 1.380(3) |
| N8-C8           | 1.446(3) | N3-N4   | 1.373(2) | C4-C9   | 1.436(3) | N3-C1   | 1.333(2) |
| N4-C3           | 1.345(3) | N5-C3   | 1.362(3) | O9-N9   | 1.232(2) | O10-N9  | 1.229(2) |
| O11-N10         | 1.229(2) | C2-C3   | 1.390(3) | O12-N10 | 1.246(2) | O14-N11 | 1.203(3) |
| O15-N11         | 1.213(2) | O16-C15 | 1.255(2) | N9-C10  | 1.447(2) |         |          |

Table S9. Selected dihedral angles for salt 4

| Dihedral angle (°) |             |             |             |             |             |             |            |
|--------------------|-------------|-------------|-------------|-------------|-------------|-------------|------------|
| O1-N6-C4-C5        | -121.83(19) | O1-N6-C4-C9 | 58.2(2)     | O2-N6-C4-C9 | -121.32(19) | O4-N7-C6-C5 | 6.2(3)     |
| O4-N7-C6-C7        | -172.16(18) | O5-N7-C6-C5 | -174.84(18) | O5-N7-C6-C7 | 6.8(3)      | O6-N8-C8-C9 | 172.59(18) |
| N6-C4-C5-O3        | 1.7(3)      | N6-C4-C5-C6 | -179.17(17) | C9-C4-C5-O3 | -178.39(18) | C9-C4-C5-C6 | 0.8(3)     |
| N6-C4-C9-O8        | 0.2(3)      | N6-C4-C9-C8 | 178.23(16)  | C5-C4-C9-O8 | -179.76(19) | C5-C4-C9-C8 | -1.7(3)    |
| O3-C5-C6-N7        | 2.0(3)      | O3-C5-C6-C7 | -179.68(18) | C4-C5-C6-N7 | -177.14(18) | C4-C5-C6-C7 | 1.2(3)     |
| N7-C6-C7-C8        | 176.34(18)  | C5-C6-C7-C8 | -2.0(3)     | C6-C7-C8-N8 | -178.19(18) | C6-C7-C8-C9 | 1.0(3)     |

Table S10. Selected bond lengths for salt 5

| Bond length (Å) |          |         |          |        |          |        |          |
|-----------------|----------|---------|----------|--------|----------|--------|----------|
| O1-N16          | 1.303(4) | N12-N13 | 1.389(4) | O2-N16 | 1.258(4) | N12-C3 | 1.355(5) |



|        |          |        |          |        |          |         |          |
|--------|----------|--------|----------|--------|----------|---------|----------|
| N1-N16 | 1.307(4) | N13-C5 | 1.351(5) | N1-C1  | 1.396(5) | N14-N15 | 1.437(4) |
| N2-N3  | 1.363(4) | N14-C5 | 1.399(5) | N2-C1  | 1.353(5) | C3-C4   | 1.411(5) |
| N3-N4  | 1.307(4) | C4-C5  | 1.387(5) | N4-N5  | 1.356(4) | N5-C1   | 1.347(5) |
| O3-N17 | 1.283(4) | O4-N17 | 1.254(4) | N6-N17 | 1.322(4) | N6-C2   | 1.381(5) |
| N7-N8  | 1.362(4) | N7-C2  | 1.345(5) | N8-N9  | 1.307(4) | N9-N10  | 1.357(4) |
| N10-C2 | 1.357(5) | N11-C3 | 1.343(5) |        |          |         |          |

Table S11. Selected dihedral angles for salt **5**

| Dihedral angle (°) |           |                |          |               |           |               |           |
|--------------------|-----------|----------------|----------|---------------|-----------|---------------|-----------|
| C1-N1-N16-O1       | -179.4(3) | C1-N1-N16-O2   | 0.1(5)   | N16-N1-C1-N5  | 179.6(3)  | C1-N2-N3-N4   | -0.1(4)   |
| N3-N2-C1-N1        | -178.6(4) | N3-N2-C1-N5    | -0.2(4)  | N2-N3-N4-N5   | 0.3(4)    | N3-N4-N5-C1   | -0.5(4)   |
| N4-N5-C1-N1        | 179.1(3)  | N4-N5-C1-N2    | 0.4(4)   | C2-N6-N17-O3  | 176.3(3)  | N17-N6-C2-N7  | -175.9(3) |
| N17-N6-C2-N10      | 1.4(6)    | C2-N7-N8-N9    | -0.6(4)  | N8-N7-C2-N6   | 178.3(3)  | N8-N7-C2-N10  | 0.3(4)    |
| N7-N8-N9-N10       | 0.6(4)    | N8-N9-N10-C2   | -0.4(4)  | N9-N10-C2-N6  | -177.5(4) | N9-N10-C2-N7  | 0.0(4)    |
| C3-N12-N13-C5      | 0.8(4)    | N13-N12-C3-N11 | 179.7(3) | N13-N12-C3-C4 | -0.3(4)   | N12-N13-C5-C4 | -1.0(4)   |

### Section 3. Non-isothermal kinetics and hygroscopic property analysis

The kinetic parameters of the energetic salts **2-5**, including the pre-exponential factor ( $A_k$ ), apparent activation energy ( $E_a$ ) and the linear coefficient ( $R$ ) have been calculated using various heating modes of Kissinger's method and Ozawa-Doyle's method. The non-isothermal kinetic parameters of the salts were listed in Table S13.

Table S12. Peak temperatures of the first exothermic stage determined by DSC curves at different heating rates of salts **2-5**.

| $\beta(^{\circ}\text{C}\cdot\text{min}^{-1})$ | 5     | 10    | 15    | 20    |
|-----------------------------------------------|-------|-------|-------|-------|
| <b>2</b>                                      | 171.5 | 178.4 | 183.7 | 187.4 |
| <b>3</b>                                      | 149.8 | 156.4 | 161.8 | 166.1 |
| <b>4</b>                                      | 158.5 | 164.8 | 170.4 | 174.0 |
| <b>5</b>                                      | 186.3 | 192.4 | 197.5 | 201.8 |

Table S13. The Non-Isothermal kinetic parameters of salts **2-5**.

|          | $E_k(\text{kJ}\cdot\text{mol}^{-1})$ | $\ln[A_k(\text{s}^{-1})]$ | $R_k$   | $E_o(\text{kJ}\cdot\text{mol}^{-1})$ | $R_o$   |
|----------|--------------------------------------|---------------------------|---------|--------------------------------------|---------|
| <b>2</b> | 140.3                                | 14.35                     | -0.9978 | 140.6                                | -0.9981 |
| <b>3</b> | 124.0                                | 13.18                     | -0.9948 | 124.7                                | -0.9953 |
| <b>4</b> | 134.5                                | 14.15                     | -0.9952 | 134.8                                | -0.9957 |
| <b>5</b> | 154.4                                | 15.45                     | -0.9930 | 154.2                                | -0.9936 |

The Arrhenius equations of salts **2-5** were expressed as follows:

$$\ln k = 14.35 - 140.5 \times 10^3 / (RT) \quad (2)$$

$$\ln k = 13.18 - 124.4 \times 10^3 / (RT) \quad (3)$$

$$\ln k = 14.15 - 134.7 \times 10^3 / (RT) \quad (4)$$

$$\ln k = 15.45 - 154.3 \times 10^3 / (RT) \quad (5)$$

The hygroscopic property of salt **2** was tested and the test process was given in the supporting information. The salt **2** sample was put in the drying oven and dried at 60 °C for 2 hours to make the sample dry thoroughly. The testing sample (about 3g) was put into the weighing bottle and the

bottle was put into drying vessel with saturated solution of potassium nitrate at the bottom. The temperature of the test environment is 25 °C and the relative humidity is 50%. The weighing bottle was weighed every 24 hours until the weight difference between the two the weighing bottle is no more than 0.0002g. The hygroscopic property for salt **2** was calculated according to following equation. The curve of hygroscopicity with time is given in Figure S5. The hygroscopicity for salt **2** is 0.1018%, which is acceptable.

$$\omega = \frac{W_t - W_0}{W_0} \times 100\%$$

In which,  $\omega$  is the mass change fraction, %;  $W_t$  is the weight of sample after hygroscopic test, g;  $W_0$  is the weight of the dried sample, g.

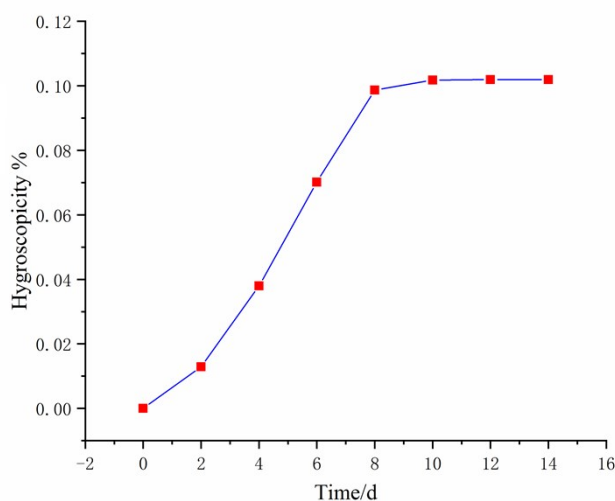

Figure S5 Change curve of hygroscopicity

#### Section 4. Measurement of energy of constant volume combustion

The combustion heat was measured by a Parr-6200 bomb calorimeter (static jacket) with a 6510 water handling system. The calorimeter was calibrated by the combustion of certified benzoic acid in an oxygen atmosphere at a pressure of 3.05 MPa. The constant-volume heat of combustion ( $Q_v = -2456.75 \text{ kJ} \cdot \text{mol}^{-1}$ ) of salt **2** was averaged after three independent experiments. The constant-pressure heat of combustion ( $Q_p = -2450.56 \text{ kJ} \cdot \text{mol}^{-1}$ ) was calculated by the formula  $Q_p = Q_v + \Delta nRT$ . The heat of formation ( $\Delta_f H = -16.2 \text{ kJ} \cdot \text{mol}^{-1}$ ) for salt **2** were calculated according to the Hess thermochemical cycle and the combustion reactions (6), which was given in the supporting information.

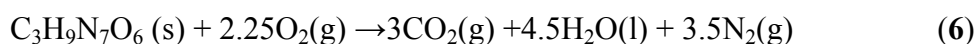

## Section 5. Computational structural considerations

Electrostatic potential (ESP) and natural bond orbitals (NBO) and of HAP were calculated using the density functional theory with B3LYP/6-311++G\*\* method. The optimized geometry of HAP is given in Figure S6. The calculated NBO charges for HAP are displayed in Table S14.

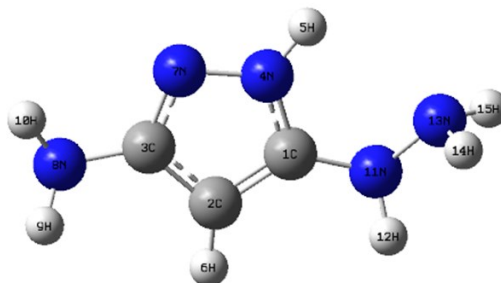

Figure S6 Optimized geometry of HAP

Table S14. Natural Population Analysis for HAP

| Charge(a.u.) |        |     |        |    |        |     |       |
|--------------|--------|-----|--------|----|--------|-----|-------|
| C1           | 0.358  | H9  | 0.366  | C2 | -0.420 | H10 | 0.377 |
| C3           | 0.341  | N11 | -0.466 | N4 | -0.375 | H12 | 0.354 |
| H5           | 0.412  | N13 | -0.662 | H6 | 0.216  | H14 | 0.341 |
| N7           | -0.393 | H15 | 0.359  | N8 | -0.808 |     |       |
